# Supplementary material for: Glucose metabolic disorder in Klinefelter syndrome: a retrospective analysis in a single Chinese hospital and literature review
Source: BMC Endocr Disord. 2021 Dec 1;21:239. doi: 10.1186/s12902-021-00893-5 (PMC8638221; doi:10.1186/s12902-021-00893-5)
Supplement: Supplementary file 1 — Additional file 1. Supplementary Table 1. Characteristics of patients in our center and previous case reports [file 12902_2021_893_MOESM1_ESM.xlsx]

## Sheet: 工作表1
Supplementary Table 1. Characteristics of patients in our center and previous case reports
Author, year (ref.)	Number of patients	Age (year)	BMI (kg/m2)	SBP	DBP	Testes size (ml)	T (ng/ml)	FSH (IU/L)	LH (IU/L)	TC (mmol/L)	TG (mmol/L)	LDL-c (mmol/L)	HDL-c (mmol/L)	HbA1c (%)	FBG (mmol/L)	FINS (μIU/ml)	HOMA-IR	HOMA-β	Karyotype	DM diagnosis	Infertility	Small testicles	Gynecomastia	Behavioral and intelligence problems	Delayed secondary sexual characteristics	Cryptorchidism	Decreased testosterone levels	Increased gonadotropin levels
our center	9	22	22.66	173	121	—	1.5	29.8	26.56	10.56	5.33	5.75	1.08	9.7	8.8	—	—	—	—	DM	Y	—	N	N	Y	N	Y	Y
		15	24.76	145	94	2.5	1.41	45.85	20.66	6.29	3.69	2.32	1.01	9.4	8.1	13.74	4.93	59.57	47 XXY	DM	Y	—	Y	N	Y	N	Y	Y
		13	24.4536	151	70	3	2.42	30.98	19.09	5.41	2.94	—	1.45	—	6	80.47	21.4587	644	—	DM	unknown	—	N	N	N	N	Y	Y
		10	19.1075	102	58	3.5	5.79	＜0.2	＜0.2	3.89	1.02	2.35	—	5.4	4.6	13.32	2.7232	241.82	—	Prediabetes	unknown	—	N	N	N	N	—	—
		29	20.01	170	118	5.5	0.87	42.68	23.43	3.74	1.53	2.23	0.84	6.7	5.2	5.1	1.18	60	—	DM	Y	N	N	N	Y	N	Y	Y
		18	30.56	130	80	—	—	—	—	3.85	1.51	2.28	1.13	—	8.2	—	—	—	—	DM	Y	—	Y	N	Y	Y	Y	_
		—	—	—	—	1	—	38.9	40	—	—	—	—	9.1	6.7	—	—	—	47 XXY	DM	unknown	Y	—	—	—	—	—	Y
		31	—	—	—	—	1.6	22.38	39.94	—	—	—	—	6.1	6.9	—	—	—	47 XXY	Prediabetes	unknown	—	—	Y	—	—	Y	Y
		19	19.4094	142	88	5	2.11	32.34	16.71	3.97	1.95	2.7	0.76	—	9.8	10.9	4.75	37.6	—	DM	unknown	N	Y	N	N	N	Y	Y
Wei, 2019 (29)	1	19	15.9	—	—	—	0.38	50.14	29.67	—	—	—	—	12.2	19.6	—	—	—	49 XXXXY	All DM	unknown	Y	N	Y	Y	N	Y	Y
HARA, 1970 (30)	2	17	23.8	110	60	—	—	—	—	—	—	—	—	—	—	—			47 XXY		unknown	Y	N	N	Y	N	—	—
		51	35.3	185	85	—	—	—	—	—	—	—	—	—	—	—			—		—	Y	N	Y	—	Y	—	—
Yoshiuchi, 2006 (31)	1	27	26.2	—	—	—	—	—	—	—	—	—	—	12.9	14.4	—	insulin resistance confirmed by Insulin-stress test		47 XXY		—	—	—	—	—	—	—	—
Gotoh, 2002 (32)	1	46	27.2	200	120	1.5	under lower limit	0.9	＜0.5				4.27	7.6	7.1	5.1	—		46 XY/47 XXY		Y	Y	N	N	—	N	Y	N
Yamaguchi, 2019 (33)	1	45	38.1	—	—	—	0.79	26.5	31.7	3.56	1.95	0.98	5.43	8.5	5.9(with hypoglycemia durgs)	25.6			47 XXY		Y	Y	—	N	N	N	Y	Y
Kim, 2006 (34)	1	18	19.2	120	80	0.5	< 0.1	58.31	24.09	—	—	—	—	12.2	9.1	—			49 XXXXY		unknown	Y	N	Y	Y	Y	Y	Y
Seno, 2019 (35)	2	40	27.5	—	—	—	0.76	22.9	27.8	—	—	—	—	—	—	—			47 XXY		—	Y	—	—	—	—	Y	Y
		33	28.7	—	—	—	0.91	25.7	30	—	—	—	—	—	—	—			47 XXY		Y	Y	—	—	—	—	Y	Y
Isobe, 1992 (36)	1	41	—	—	—	1	0.5	35	39	—	—	—	—	13.4	above upper limit	7			47 XXY		—	Y	N	N	—	N	Y	Y
Tojo, 1996 (37)	1	35	26.1	152	84	1	0.21	86	43	—	2.37	1.11	5.89	—	—	—			46 XY/47 XXY		—	Y	Y	Y	—	N	Y	Y
Ayli, 2009 (38)	1	26	30	—	—	—	under lower limit	4.41	17	2.55	1.25	1.34	—	6.2(with hypoglycemia durgs)	—	—			47 XXY		—	—	—	—	—	—	Y	Y
Abbreviations: BMI, body mass index; SBP, systolic blood pressure; DBP, diastolic blood pressure; T, testosterone; FSH, follicle stimulating hormone; LH, luteinizing hormone. TC, total cholestero; TG, triglyceride; LDL-c, low density lipoprotein cholesterol level; HDL-c, high density lipoprotein cholesterol level; DM, diabetes mellitus; FBG, fasting blood glucose; FINS, fasting serum insulin; HOM…
